# Supplementary material
Source: MDPI journal article supplement (https://www.mdpi.com/2624-5647/1/1/8)
Supplement: s1 [file s1]

## Supplementary

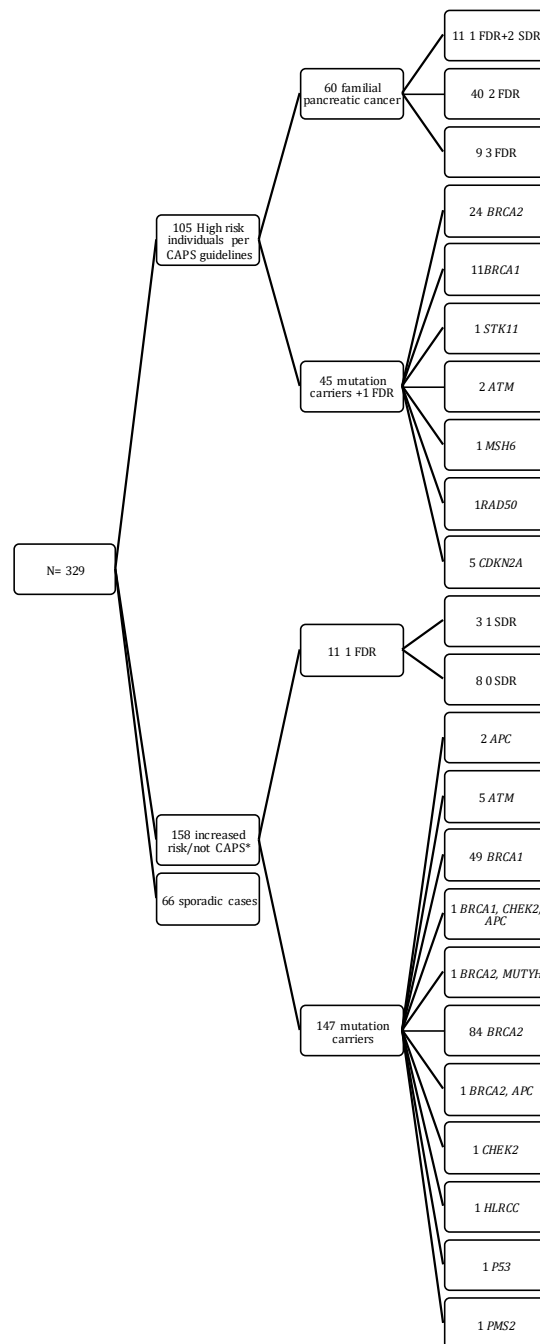

**Figure S1.** Breakdown of the study cohort. High risk individuals fulfill the CAPS guideline for being at high risk for PDAC, elevated risk individuals have an increased risk for PDAC but do not meet the CAPS guidelines, and sporadic cases have no known deleterious mutation or family history of PDAC.
